# Supplementary material for: Wide band gap thiophosphates ASrPS4 (A = Li, Na, K, Rb, Cs): cation size effect induced successive structural transformation
Source: Royal Society of Chemistry journal article supplement (doi:10.1039/d2dt02321k), 2022-01-01
Supplement: d2dt02321k1.pdf [file d2dt02321k1.pdf]

## Electronic Supplementary Information

### **Wide band gap thiophosphates ASrPS<sub>4</sub> (A=Li, Na, K, Rb, Cs): cation size effect induced successive structure transformation**

Yi Huang<sup>a</sup>, Junben Huang<sup>b</sup>, Yong Zhang<sup>a,c\*</sup>

<sup>a</sup> *School of Materials Science and Engineering, Harbin Institute of Technology, Harbin 150001, China.*

<sup>b</sup> *School of Materials Science and Engineering, Education Ministry Key Laboratory of Nonferrous Materials Science and Engineering, Central South University, Changsha 410083 Hunan, China.*

<sup>c</sup> *School of Materials Science and Engineering, Zhengzhou University, Zhengzhou 450001, PR China.*

*To whom correspondence should be addressed:*

*\*E-mail: yongzhang@hit.edu.cn (Yong Zhang)*

**Table S1.** Atomic coordinates and equivalent isotropic displacement parameters for ASrPS<sub>4</sub> (A=Li, Na, K, Rb, Cs).

| Atom                | x           | y           | z           | U <sub>eq</sub> | Occupancy |
|---------------------|-------------|-------------|-------------|-----------------|-----------|
| LiSrPS <sub>4</sub> |             |             |             |                 |           |
| Li(1)               | 0.250000    | 0.9668(9)   | 0.500000    | 0.040(2)        | 1         |
| Sr(1)               | 0.000000    | 0.750000    | 0.625000    | 0.0196(2)       | 1         |
| Sr(2)               | 0.500000    | 0.750000    | 0.625000    | 0.0183(2)       | 1         |
| P(1)                | 0.250000    | 0.71546(9)  | 0.500000    | 0.0143(2)       | 1         |
| S(1)                | 0.10315(6)  | 0.61568(7)  | 0.49747(4)  | 0.0191(2)       | 1         |
| S(2)                | 0.24719(7)  | 0.81655(6)  | 0.58371(4)  | 0.0211(2)       | 1         |
| NaSrPS <sub>4</sub> |             |             |             |                 |           |
| Na(1)               | 0.5934(3)   | 0.7825(3)   | 0.7429(4)   | 0.0447(7)       | 1         |
| Sr(1)               | 0.14540(6)  | 0.89567(4)  | 0.26861(7)  | 0.02039(18)     | 1         |
| P(1)                | 0.23952(15) | 0.54354(12) | 0.2954(2)   | 0.0178(3)       | 1         |
| S(1)                | 0.34959(15) | 0.68125(13) | 0.4712(2)   | 0.0229(3)       | 1         |
| S(2)                | 0.04491(15) | 0.62849(12) | 0.16092(19) | 0.0195(3)       | 1         |
| S(3)                | 0.18406(16) | 0.39595(12) | 0.4582(2)   | 0.0229(3)       | 1         |
| S(4)                | 0.36384(16) | 0.48212(13) | 0.1039(2)   | 0.0242(3)       | 1         |
| KSrPS <sub>4</sub>  |             |             |             |                 |           |
| K(1)                | 0.7877(2)   | 0.250000    | 1.0225(8)   | 0.0414(11)      | 1         |
| Sr(1)               | 0.52226(8)  | 0.250000    | 0.2100(2)   | 0.0211(4)       | 1         |
| P(1)                | 0.5983(2)   | 0.250000    | 0.7222(6)   | 0.0159(7)       | 1         |
| S(1)                | 0.6670(2)   | 0.250000    | 0.4689(6)   | 0.0240(8)       | 1         |
| S(2)                | 0.4793(2)   | 0.250000    | 0.6577(6)   | 0.0230(8)       | 1         |
| S(3)                | 0.62181(14) | 0.4957(4)   | 0.8977(4)   | 0.0222(6)       | 1         |
| RbSrPS <sub>4</sub> |             |             |             |                 |           |
| Rb(1)               | 0.70958(3)  | 1.250000    | 0.49457(9)  | 0.04372(15)     | 1         |
| Sr(1)               | 0.52061(2)  | 0.750000    | 0.20859(6)  | 0.02230(11)     | 1         |
| P(1)                | 0.59667(6)  | 0.750000    | 0.72308(15) | 0.01719(19)     | 1         |
| S(1)                | 0.66281(6)  | 0.750000    | 0.46728(16) | 0.0242(2)       | 1         |
| S(2)                | 0.61909(4)  | 0.50528(9)  | 0.89890(11) | 0.02319(15)     | 1         |
| S(3)                | 0.48101(6)  | 0.750000    | 0.65956(16) | 0.0260(2)       | 1         |
| CsSrPS <sub>4</sub> |             |             |             |                 |           |
| Cs(1)               | 0.70669(3)  | 0.750000    | 0.45337(13) | 0.0470(2)       | 1         |
| Sr(1)               | 0.51730(4)  | 0.250000    | 0.20509(11) | 0.02371(19)     | 1         |
| P(1)                | 0.59489(10) | 0.250000    | 0.7239(3)   | 0.0183(4)       | 1         |
| S(1)                | 0.65593(11) | 0.250000    | 0.4603(3)   | 0.0242(4)       | 1         |
| S(2)                | 0.48352(11) | 0.250000    | 0.6650(3)   | 0.0290(4)       | 1         |
| S(3)                | 0.61640(8)  | 0.49263(19) | 0.9007(2)   | 0.0252(3)       | 1         |

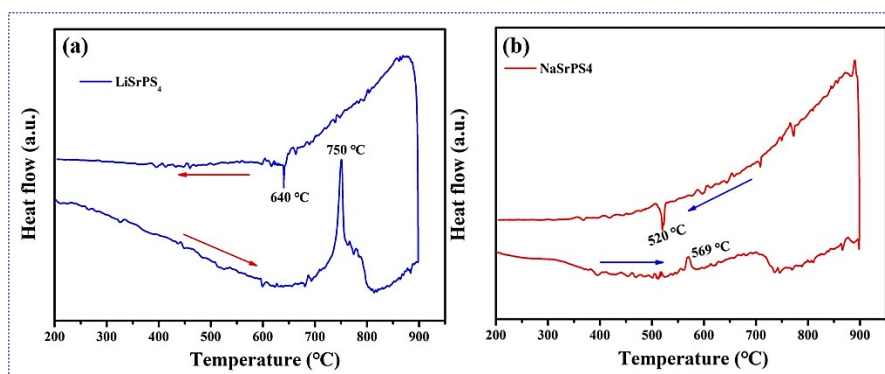

**Figure S1.** Differential scanning calorimetry (DSC) curves of  $\text{LiSrPS}_4$  (a) and  $\text{NaSrPS}_4$  (b).

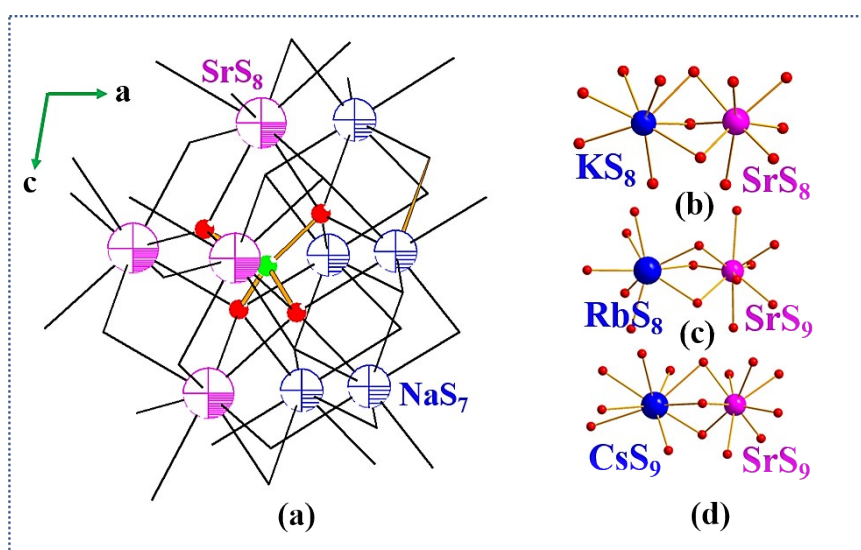

**Figure S2.** (a) The connection of  $[\text{PS}_4]$  tetrahedra with  $[\text{SrS}_8]$  and  $[\text{NaS}_7]$  by sharing S atoms to form the 3D structure. (b) The connection of  $[\text{KS}_8]$  and  $[\text{SrS}_8]$  in  $\text{KSrPS}_4$ . (c) The connection of  $[\text{RbS}_8]$  and  $[\text{SrS}_9]$  in  $\text{RbSrPS}_4$ . (d) The connection of  $[\text{CsS}_9]$  and  $[\text{SrS}_9]$  in  $\text{CsSrPS}_4$ .

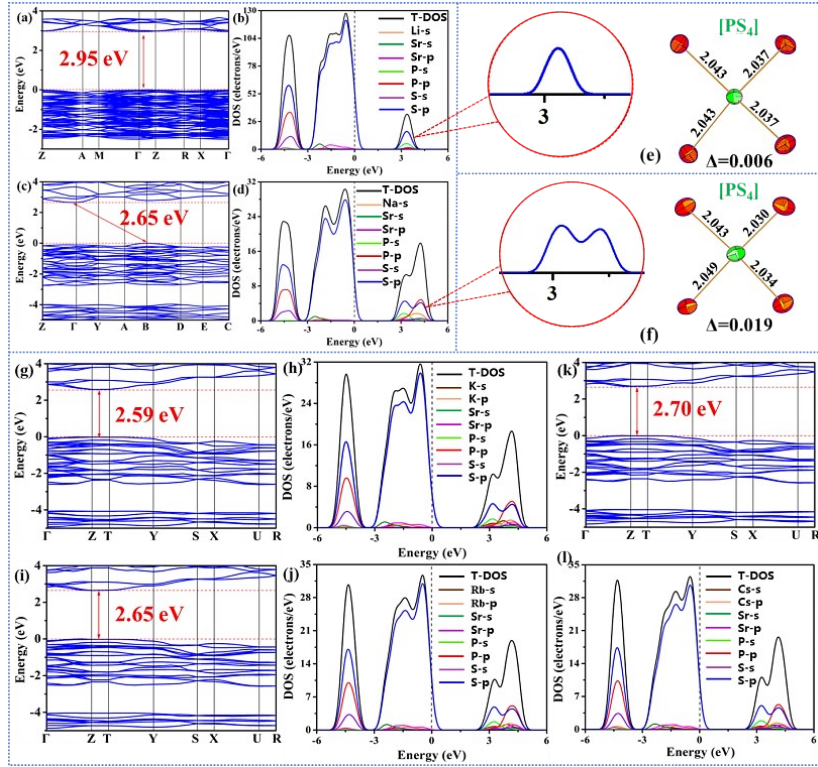

**Figure S3.** The theoretical band gap and the partial density of states (PDOS) of  $\text{ASrPS}_4$  ( $\text{A}=\text{Li}, \text{Na}, \text{K}, \text{Rb}, \text{Cs}$ ), (e) and (f) are isolated  $[\text{PS}_4]$  units with bond distance of P-S.
